# Supplementary material for: Dissociative adsorption of O2 on negatively charged nitrogen-doped single-walled carbon nanotubes: first-principles calculations
Source: Royal Society of Chemistry journal article supplement (doi:10.1039/c6ra14023h), 2016-01-01
Supplement: c6ra14023h1.pdf [file c6ra14023h1.pdf]

## SUPPLEMENTARY

TABLE S. The calculated O-O, C-O, C\*-O, N-O, C-C\*, and C\*-N bond lengths of the N-SWNTs<sup>0</sup> for all three adsorption states in Å. Where C\* is one of the carbon atoms adjacent to N atom on which oxygen adsorption is considered.

| N-SWNT     | Physisorption state  |                 | Chemisorption state |      | Dissociative adsorption |       |
|------------|----------------------|-----------------|---------------------|------|-------------------------|-------|
| Charge (Q) | 0                    | -1              | 0                   | -1   | 0                       | -1    |
| (15,0)MZ   | Diameter = 11.74 Å   |                 |                     |      |                         |       |
| O-O        | 1.24                 | 1.24            | 1.50                | 1.50 | 2.80                    | 2.80  |
| C-O        | 3.67                 | 3.58            | 1.52                | 1.52 | 1.45                    | 1.46  |
| C*-O       | 3.45                 | 3.94 (N-O 3.49) | 1.47                | 1.47 | 1.43                    | 1.43  |
| C-C*       | 1.41                 | 1.41            | 1.53                | 1.53 | 1.49                    | 1.49  |
| C*-N       | 1.41                 | 1.41            | 1.48                | 1.48 | 1.465                   | 1.465 |
| (18,0)MZ   | Diameter = 14.09 Å   |                 |                     |      |                         |       |
| O-O        | 1.24                 | 1.24            | 1.50                | 1.50 | 2.67                    | 2.67  |
| C-O        | 3.61                 | 3.62            | 1.52                | 1.52 | 1.43                    | 1.43  |
| C*-O       | 3.33                 | 3.65 (N-O 3.45) | 1.47                | 1.47 | 1.24                    | 1.24  |
| C-C*       | 1.42                 | 1.42            | 1.53                | 1.53 | 1.53                    | 1.53  |
| C*-N       | 1.41                 | 1.41            | 1.48                | 1.48 | 2.10                    | 2.07  |
| (21,0)MZ   | Diameter = 16.4406 Å |                 |                     |      |                         |       |
| O-O        | 1.24                 | 1.24            | 1.50                | 1.50 | 2.79                    | 2.79  |
| C-O        | 3.56                 | 3.71            | 1.52                | 1.53 | 1.45                    | 1.46  |
| C*-O       | 3.23                 | 3.28            | 1.47                | 1.48 | 1.43                    | 1.43  |
| C-C*       | 1.42                 | 1.42            | 1.53                | 1.53 | 1.49                    | 1.49  |
| C*-N       | 1.41                 | 1.41            | 1.48                | 1.48 | 1.47                    | 1.47  |
| (16,0)SZ   | Diameter = 12.53 Å   |                 |                     |      |                         |       |
| O-O        | 1.25                 | 1.25            | 1.50                | 1.50 | 2.73                    | 2.68  |
| C-O        | 3.20                 | 3.61            | 1.53                | 1.53 | 1.42                    | 1.42  |
| C*-O       | 3.07                 | 3.23            | 1.48                | 1.47 | 1.35                    | 1.24  |

|           |                     |                 |      |      |      |      |
|-----------|---------------------|-----------------|------|------|------|------|
| C-C*      | 1.41                | 1.41            | 1.54 | 1.53 | 1.53 | 1.52 |
| C*-N      | 1.42                | 1.42            | 1.48 | 1.48 | 1.56 | 2.12 |
| (17,0)SZ  | Diameter = 13.25 Å  |                 |      |      |      |      |
| O-O       | 1.24                | 1.25            | 1.50 | 1.50 | 2.68 | 2.68 |
| C-O       | 3.76                | 3.61            | 1.52 | 1.53 | 1.42 | 1.43 |
| C*-O      | 3.76                | 4.14 (N-O 3.71) | 1.47 | 1.48 | 1.24 | 1.24 |
| C-C*      | 1.41                | 1.42            | 1.53 | 1.53 | 1.53 | 1.53 |
| C*-N      | 1.40                | 1.41            | 1.48 | 1.48 | 2.11 | 2.10 |
| (19,0)SZ  | Diameter = 14.91 Å  |                 |      |      |      |      |
| O-O       | 1.24                | 1.24            | 1.50 | 1.50 | 2.80 | 2.80 |
| C-O       | 3.69                | 3.84            | 1.52 | 1.55 | 1.45 | 1.46 |
| C*-O      | 3.64                | 3.51            | 1.47 | 1.47 | 1.42 | 1.42 |
| C-C*      | 1.42                | 1.42            | 1.53 | 1.53 | 1.49 | 1.49 |
| C*-N      | 1.41                | 1.41            | 1.48 | 1.48 | 1.47 | 1.47 |
| (20,0)SZ  | Diameter = 15.66 Å  |                 |      |      |      |      |
| O-O       | 1.24                | 1.25            | 1.50 | 1.50 | 2.79 | 2.79 |
| C-O       | 3.72                | 3.75            | 1.53 | 1.54 | 1.46 | 1.45 |
| C*-O      | 3.28                | 3.30            | 1.47 | 1.48 | 1.42 | 1.42 |
| C-C*      | 1.42                | 1.42            | 1.53 | 1.53 | 1.49 | 1.49 |
| C*-N      | 1.41                | 1.41            | 1.48 | 1.48 | 1.47 | 1.47 |
| (9,9)MA   | Diameter = 12.204 Å |                 |      |      |      |      |
| O-O       | 1.25                | 1.26            | 1.50 | 1.49 | 2.81 | 2.84 |
| C-O       | 3.32                | 3.07            | 1.52 | 1.59 | 1.45 | 1.45 |
| C*-O      | 3.23                | 2.96            | 1.47 | 1.50 | 1.25 | 1.28 |
| C-C*      | 1.41                | 1.42            | 1.57 | 1.56 | 1.56 | 1.57 |
| C*-N      | 1.41                | 1.41            | 1.46 | 1.45 | 1.88 | 1.72 |
| (10,10)MA | Diameter = 13.56 Å  |                 |      |      |      |      |

|           |                     |                 |      |      |      |      |
|-----------|---------------------|-----------------|------|------|------|------|
| O-O       | 1.25                | 1.26            | 1.50 | 1.49 | 3.02 | 2.83 |
| C-O       | 3.30                | 3.89            | 1.53 | 1.59 | 1.46 | 1.45 |
| C*-O      | 3.06                | 3.67            | 1.47 | 1.50 | 1.42 | 1.27 |
| C-C*      | 1.41                | 1.42            | 1.57 | 1.56 | 1.46 | 1.57 |
| C*-N      | 1.41                | 1.41            | 1.46 | 1.45 | 1.46 | 1.73 |
| (11,11)MA | Diameter = 14.916 Å |                 |      |      |      |      |
| O-O       | 1.25                | 1.28            | 1.50 | 1.49 | 3.04 | 2.81 |
| C-O       | 3.31                | 3.12            | 1.53 | 1.59 | 1.46 | 1.45 |
| C*-O      | 3.23                | 3.09 (N-O 2.92) | 1.47 | 1.50 | 1.42 | 1.28 |
| C-C*      | 1.41                | 1.42            | 1.57 | 1.56 | 1.52 | 1.57 |
| C*-N      | 1.41                | 1.41            | 1.46 | 1.45 | 1.46 | 1.72 |
| (12,12)MA | Diameter = 16.272 Å |                 |      |      |      |      |
| O-O       | 1.25                | 1.26            | 1.50 | 1.49 | 2.76 | 2.80 |
| C-O       | 3.36                | 3.18            | 1.53 | 1.59 | 1.44 | 1.45 |
| C*-O      | 3.06                | 2.99            | 1.47 | 1.50 | 1.26 | 1.27 |
| C-C*      | 1.41                | 1.42            | 1.57 | 1.56 | 1.56 | 1.57 |
| C*-N      | 1.41                | 1.41            | 1.46 | 1.45 | 1.86 | 1.73 |

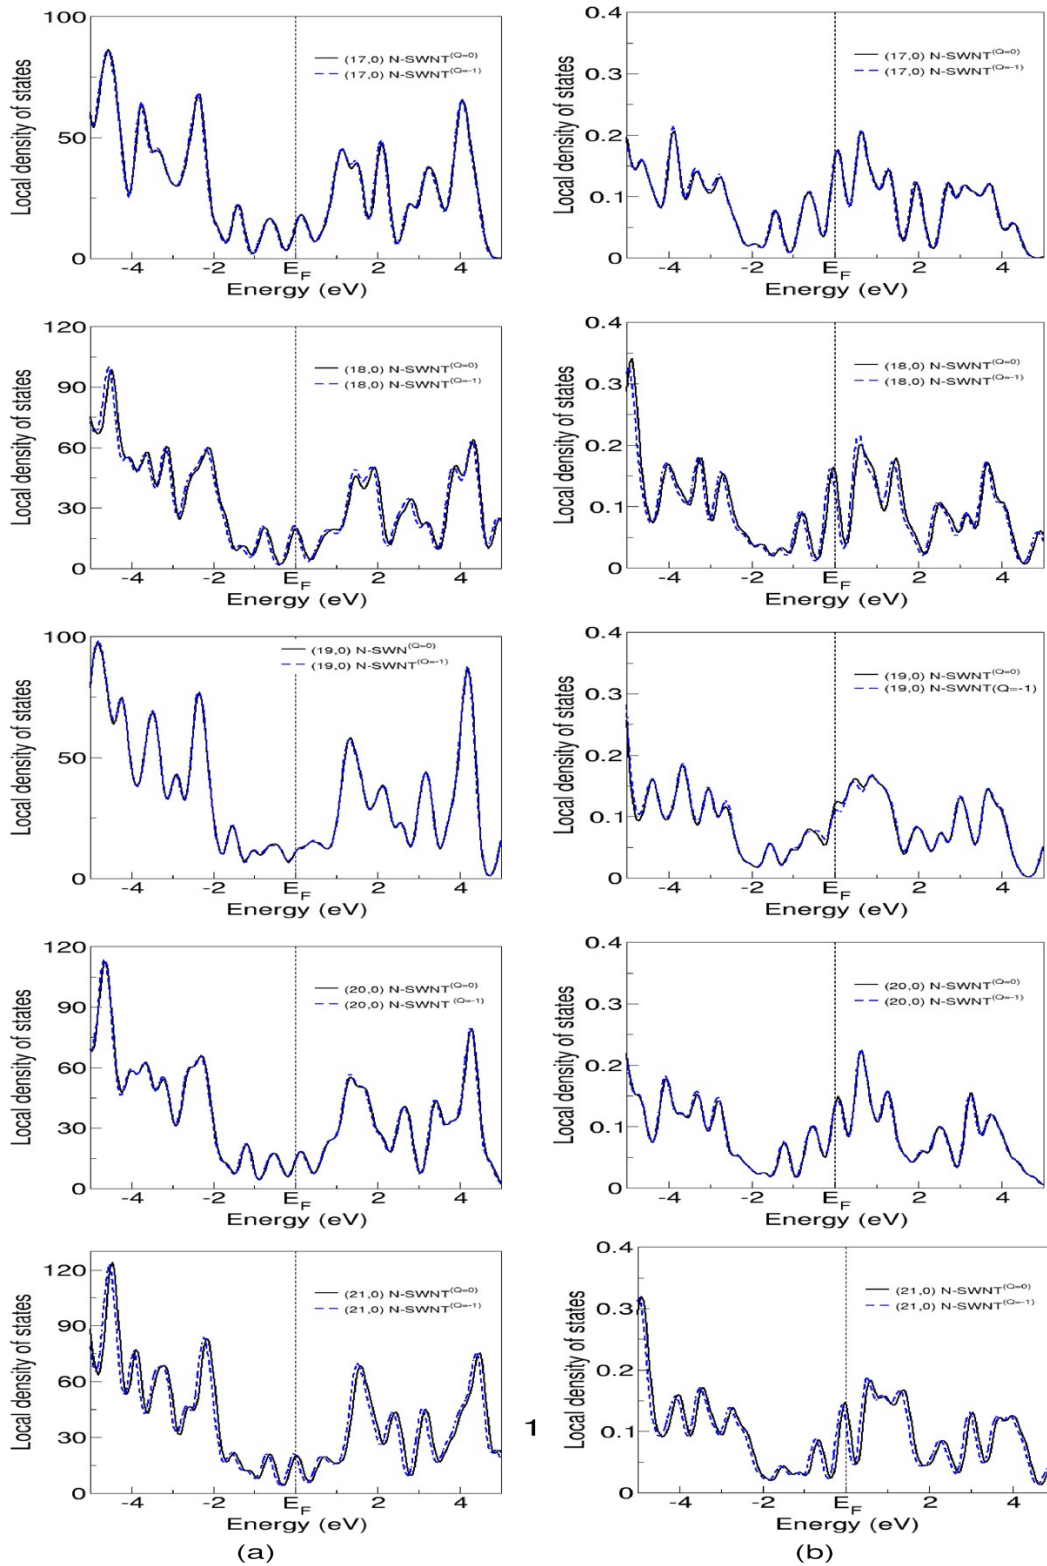

FIG. S1. Local density of states of zigzag N-SWNTs<sup>(Q=-1 and 0)</sup> (a) all C atoms, and (b) a N atom.  $E_F$  represents the Fermi level.

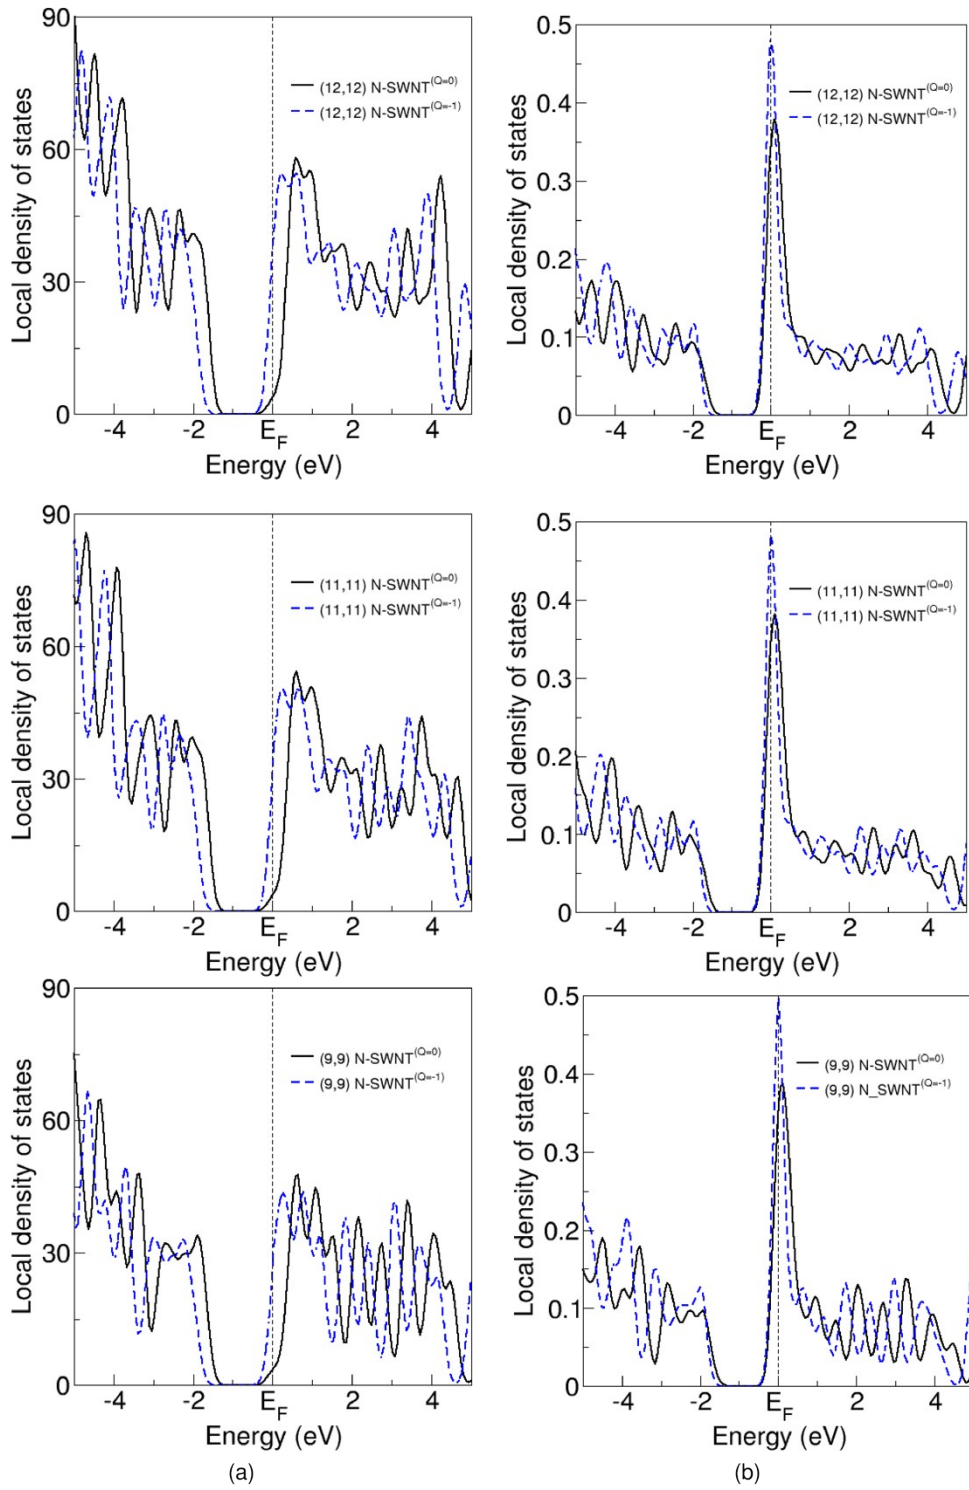

FIG. S2. Local density of states of armchair N-SWNTs ( $Q=-1$  and  $0$ ) (a) all C atoms, and (b) a N atom.  $E_F$  represents the Fermi
